# Supplementary material for: Preparation and characterization of molecularly imprinted solid amine adsorbent for CO2adsorption
Source: Royal Society of Chemistry journal article supplement (doi:10.1039/c8nj00686e), 2018-01-01
Supplement: c8nj00686e1.pdf [file c8nj00686e1.pdf]

## **Preparation and characterization of molecularly imprinted solid amine adsorbent for CO<sub>2</sub> adsorption**

Fenglei Liu<sup>a</sup>, Yizhu Kuang<sup>a</sup>, Shuoyu Wang<sup>a</sup>, Shuixia Chen<sup>a,b\*</sup>, Wenhao Fu<sup>a</sup>

<sup>a</sup>*PCFM Lab, School of Chemistry, Sun Yat-Sen University, Guangzhou 510275, PR*

*China*

<sup>b</sup>*Materials Science Institute, Sun Yat-Sen University, Guangzhou 510275, PR China*

---

\* Corresponding author. *E-mail address:* [cescsx@mail.sysu.edu.cn](mailto:cescsx@mail.sysu.edu.cn)

**Table S1.** Comparison of the amine density and CO<sub>2</sub> adsorption capacity for MIP-PEIs and MIP1.

| Adsorbent | N (%) | N (mmol/g) | Q <sub>e</sub> (mmol/g) | Ref       |
|-----------|-------|------------|-------------------------|-----------|
| MIP-PEIs  | 15.97 | 11.41      | 6.58                    | This work |
| MIP1      | 1.32  | 0.94       | 0.42                    | Ref [18]  |

Q<sub>e</sub> : equilibrium adsorption amount

**Table S2** The BET surface area and pore volume of NIP-PEIs and MIP-PEIs

| Adsorbent | BET surface area (m <sup>2</sup> /g) | Pore volume (cm <sup>3</sup> /g) |
|-----------|--------------------------------------|----------------------------------|
| NIP-PEIs  | 2.57                                 | 0.012                            |
| MIP-PEIs  | 4.78                                 | 0.033                            |

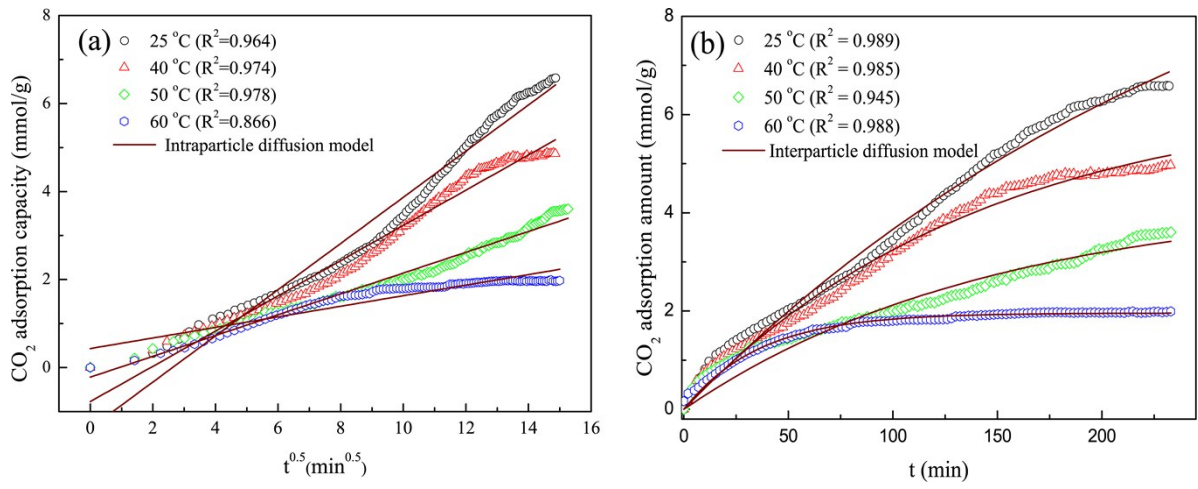

**Fig. S1.** The plots of diffusion models for CO<sub>2</sub> adsorption at different temperature (a) plots of intraparticle diffusion model for  $q_t$  against  $t^{0.5}$  and (b) plots of interparticle diffusion model for  $q_t$  against  $t$ .
